# Supplementary material for: Donor-modified asymmetric N/B/O multi-resonance TADF emitters for high-performance deep-blue OLEDs with the BT.2020 color gamut
Source: Royal Society of Chemistry journal article supplement (doi:10.1039/d4sc04896b), 2024-01-01
Supplement: d4sc04896b1.pdf [file d4sc04896b1.pdf]

# Supporting Information

## Donor-Modified Asymmetric N/B/O Multi-Resonance TADF Emitters for High-Performance Deep-Blue OLEDs with BT.2020 Color Gamut

Jing Jin,<sup>a,†</sup> Zhaolong He,<sup>a,†</sup> Di Liu,<sup>\*a</sup> Yongqiang Mei,<sup>c</sup> Jiahui Wang,<sup>c</sup> Huihui Wan,<sup>d</sup>

Jiuyan Li,<sup>\*b,c</sup>

<sup>a</sup> Frontier Science Center for Smart Materials, College of Chemistry, Dalian  
University of Technology, 2 Linggong Road, Dalian, 116024, China.

Email: [liudi@dlut.edu.cn](mailto:liudi@dlut.edu.cn)

<sup>b</sup> Shandong Laboratory of Yantai Advanced Materials and Green Manufacturing,  
Yantai Economic and Technological Development Zone, 300 Changjiang Road,  
Yantai, China.

Email: [greenjiuyanli@amgm.ac.cn](mailto:greenjiuyanli@amgm.ac.cn)

<sup>c</sup> Frontier Science Center for Smart Materials, College of Chemical Engineering,  
Dalian University of Technology, 2 Linggong Road, Dalian, 116024, China.

<sup>d</sup> Instrumental Analysis Center, Dalian University of Technology, Dalian, 116024,  
China

† These authors contributed equally to this work.

## **Contents**

- 1. Background Information**
- 2. Experimental Section**
- 3. Syntheses**
- 4. Supplementary figures**
- 5. Supplementary tables**
- 6. References**

# 1. Background Information

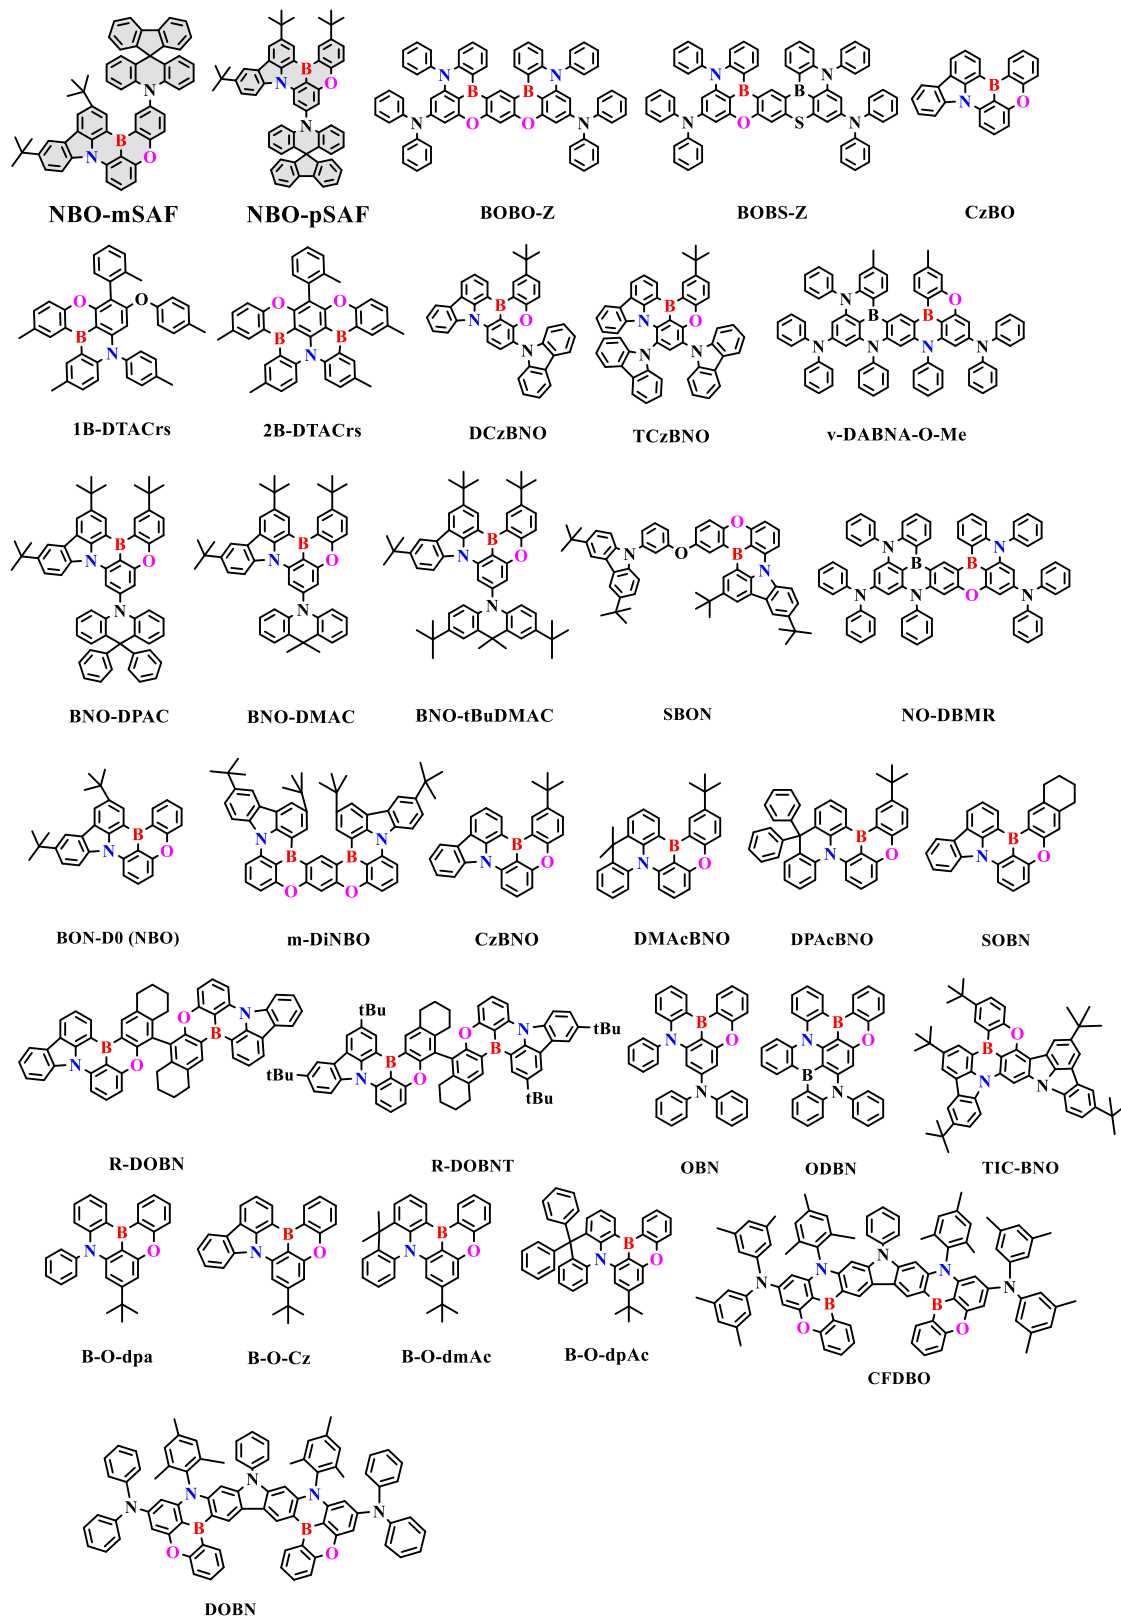

**Figure S1.** Molecular structure of the blue MR-TADF emitters with N/B/O structure.

**Table S1.** EL properties of the blue MR-TADF emitters with N/B/O structure.

| Emitter         | Device type        | $\lambda_{\text{EL}}$<br>[nm] | FWHM<br>[nm] | $\text{EQE}_{\text{max}}$<br>[%] | CIE<br>[x,y]       | Ref              |
|-----------------|--------------------|-------------------------------|--------------|----------------------------------|--------------------|------------------|
| <b>NBO-mSAF</b> |                    | <b>466</b>                    | <b>28</b>    | <b>29.5</b>                      | <b>0.128,0.114</b> | <b>This work</b> |
| <b>NBO-pSAF</b> |                    | <b>451</b>                    | <b>26</b>    | <b>20.5</b>                      | <b>0.147,0.048</b> | <b>This work</b> |
| BOBO-Z          |                    | 445                           | 18           | 13.6                             | 0.15,0.04          | 1                |
| CzBO            |                    | 448                           | 30           | 13.4                             | 0.15,0.05          | 2                |
| B-O-dpa         |                    | 443                           | 32           | 16.3                             | 0.15,0.05          | 3                |
| 1B-DTACrs       |                    | 440                           | 30           | 1.31                             | 0.154,0.049        | 4                |
| 2B-DTACrs       |                    | 447                           | 26           | 14.8                             | 0.150,0.044        |                  |
| DOBN            |                    | 449                           | 20           | 24.14                            | 0.15,0.04          | 5                |
| BNO-DPAC        | HF                 | 448                           | 36           | 27.7                             | 0.151,0.083        |                  |
| BNO-DMAC        | HF                 | 449                           | 36           | 28.7                             | 0.149,0.090        | 6                |
| BNO-tBuDMAC     | HF                 | 447                           | 59           | 27.7                             | 0.155,0.144        |                  |
| DCzBNO          | HF                 | 469                           | 45           | 31.7                             | 0.13,0.15          | 7                |
| TCzBNO          | HF                 | 482                           | 52           | 36.5                             | 0.13,0.25          |                  |
| v-DABNA-O-Me    |                    | 465                           | 23           | 29.5                             | 0.13,0.10          | 8                |
| BOBS-Z          |                    | 456                           | 23           | 26.9                             | 0.14,0.06          | 1                |
| SBON            |                    | 466                           | 28           | 13.7                             | 0.13,0.13          | 9                |
| BON-D0          | Solution-processed | 460                           | 39           | 9.7                              | 0.14,0.12          | 10               |
| NBO             |                    | 459                           | 45           | 16.8                             | 0.137,0.142        | 11               |
| m-DiNBO         |                    | 466                           | 21           | 24.2                             | 0.126,0.098        |                  |
| CzBNO           |                    | 454                           | 36           | 13.6                             | 0.14,0.08          |                  |
| DMAcBNO         |                    | 472                           | 41           | 20.4                             | 0.13,0.19          | 12               |
| DPAcBNO         |                    | 468                           | 37           | 23.0                             | 0.13,0.14          |                  |
| SOBN            |                    | 460                           | 47           | 14.6                             | 0.14,0.14          |                  |
| R-DOBN          |                    | 459                           | 38           | 23.9                             | 0.14,0.10          | 13               |
| R-DOBN-T        |                    | 464                           | 35           | 25.6                             | 0.13,0.12          |                  |
| B-O-Cz          |                    | 481                           | 63           | 13.4                             | 0.13,0.22          |                  |
| B-O-dmAc        |                    | 475                           | 44           | 16.2                             | 0.12,0.21          | 3                |
| B-O-dpAc        |                    | 473                           | 42           | 17.0                             | 0.12,0.20          |                  |
| OBN             |                    | 437                           | 44           | 15.7                             | 0.15,0.09          | 14               |
| ODBN            |                    | 446                           | 54           | 24.15                            | 0.147,0.099        |                  |

| Emitter | Device type | $\lambda_{\text{EL}}$<br>[nm] | FWHM<br>[nm] | $\text{EQE}_{\text{max}}$<br>[%] | CIE<br>[x,y] | Ref |
|---------|-------------|-------------------------------|--------------|----------------------------------|--------------|-----|
| NO-DBMR |             | 469                           | 26           | 33.7                             | 0.12,0.12    | 15  |
| TIC-BNO |             | 476                           | 38           | 34.58                            | 0.123,0.222  | 16  |
| CFDBO   |             | 469                           | 24           | 20.7                             | 0.14,0.12    | 17  |

## 2. Experimental Section

### General information

The  $^1\text{H}$  NMR spectra were measured on a 400 MHz Bruker Avance II 400 using  $\text{CDCl}_3$  as the solvent. Tetramethyl silane (TMS) was used as an internal reference. The  $^{13}\text{C}$  NMR spectra were recorded by AVANCENEO 500 M using Chloroform-d ( $\text{CDCl}_3$ ) as the solvent. The mass spectra were recorded by HP1100LC/MSD MS spectrometer and matrix-assisted laser desorption/ionization (MALDI) micro mass spectrometry (MS) spectrometer. The ultraviolet-visible (UV-Vis) absorption spectra were recorded on a Perkin-Elmer Lambda 750S spectrophotometer. Fluorescence spectra and transient photoluminescence (PL) decay at room temperature were measured with an Edinburgh FLS1000 fluorescence spectrometer. Low temperature phosphorescence spectra were measured on a Hitachi F-7000 fluorescence spectrometer at 77 K in toluene. Cyclic voltammetry (CV) curves were achieved with a CHI610E electrochemical work station, with glass-carbon as the working electrode, a saturated calomel electrode (SCE) as reference electrode and a Pt wire as counter-electrode. Oxidation and reduction curves were obtained in the 0.1 M solutions in dichloromethane (DCM) and dimethylformamide (DMF), respectively with  $n\text{-Bu}_4\text{NPF}_6$  as the supporting electrolyte. Absolute photoluminescence quantum yields (PLQYs) of the compounds were measured in doped films on a HAMAMATSU absolute PL quantum yield spectrometer (C11347).

## The Lippert-Mataga calculation

The effect of solvent polarity on photophysical properties of **NBO-mSAF** and **NBO-pSAF** was analyzed by the Lippert-Mataga equation<sup>18</sup>:

$$(S1) \quad hc(\nu_a - \nu_f) = hc(\nu_a^0 - \nu_f^0) + \frac{2(\mu_e - \mu_g)^2}{a_0^3} f(\epsilon, n)$$

According to the equation S1, we got

$$(S2) \quad \mu_e = \mu_g + \left\{ \frac{hca_0^3}{2} \cdot \left[ \frac{d(\nu_a - \nu_f)}{df(\epsilon, n)} \right] \right\}^{1/2}$$

Where  $\nu_a$  and  $\nu_f$  represent wavenumbers of maximal absorption and emission, respectively;  $h$  is the Plank constant;  $c$  is the light speed in vacuum;  $(\nu_a - \nu_f)$  is the Stokes shift;  $(\nu_a^0 - \nu_f^0)$  corresponds to the Stokes shift at  $f(\epsilon, n)=0$ ;  $\mu_e$  is the excited-state dipole;  $\mu_g$  is the ground-state dipole moment that can be estimated by DFT calculations (2.36 and 2.92 D for **NBO-mSAF** and **NBO-pSAF**, respectively);  $a_0$  is the solvent cavity (Onsager) radius and  $f(\epsilon, n)$  is the orientational polarizability of the solvent.  $a_0$  and  $f(\epsilon, n)$  can be calculated as follows:

$$(S3) \quad a_0 = \sqrt[3]{\frac{3M}{4N\pi d}}$$

Where  $N$  is the Avogadro number;  $M$  is the molecular weight and  $d$  is the density ( $d = 1.0 \text{ g cm}^{-3}$ ).

$$(S4) \quad f(\epsilon, n) = \frac{\epsilon - 1}{2\epsilon + 1} - \frac{n^2 - 1}{2n^2 + 1}$$

Where  $\epsilon$  is the solvent dielectric constant and  $n$  is solvent refractive index.

## Kinetic parameters calculation of photophysical processes

The prompt fluorescence lifetimes ( $\tau_{PF}$ ) were determined by time correlated single photon counting (TCSPC) method with a 375 nm picosecond pulsed LED as the excitation source at room temperature. And delayed fluorescence lifetimes ( $\tau_{DF}$ ) were measured using multi-channel scaling (MCS) as data acquisition technique with a 365 nm variable pulsed LED as the excitation source and at room temperature. The lifetimes were calculated using the following equations:

$$(S5) \quad \tau = \frac{B_1\tau_1^2 + B_2\tau_2^2 + B_3\tau_3^2}{B_1\tau_1 + B_2\tau_2 + B_3\tau_3}$$

The equations used to calculate the excited state kinetics parameters are as follows.

$$(S6) \quad k_p = 1 / \tau_{PF}$$

$$(S7) \quad k_d = 1 / \tau_{DF}$$

$$(S8) \quad k_r = \Phi_{PF} / \tau_{PF}$$

$$(S9) \quad \Phi_{PL} = k_r / (k_r + k_{nr})$$

$$(S10) \quad \Phi_{PF} = k_r / (k_r + k_{ISC} + k_{nr})$$

$$(S11) \quad k_{RISC} = k_p k_d \Phi_{DF} / k_{ISC} \Phi_{PF}$$

$k_p$  and  $k_d$  represent the rate constants of prompt process and delay process, while  $k_r$  and  $k_{nr}$  represent the rate constants of radiation and non-radiation.  $k_{ISC}$  and  $k_{RISC}$  represent rate constants of intersystem crossing and reverse intersystem crossing, respectively.  $\Phi_{PL}$ ,  $\Phi_{PF}$  and  $\Phi_{DF}$  represent total PLQY, quantum yield of the prompt component and quantum yield of the delayed component, respectively.  $\tau_{PF}$  and  $\tau_{DF}$  represent average lifetimes of the prompt and delayed components, respectively.

## Theoretical calculations

The theoretical calculations were performed with the Gaussian 16 package, using the density functional theory (DFT) and time-dependent density functional theory (TDDFT) method with the M062X hybrid functional. The ground states ( $S_0$ ) geometries and the lowest excited singlet and triplet states geometries ( $S_1$  and  $T_1$ ) were optimized through DFT/TD-DFT methods at the M062X/def2svp level in the gas phase. The related HOMO and LUMO orbitals, and the natural transition orbitals (NTOs) were analyzed and then plotted through Multiwfn 3.8 and VMD.<sup>19</sup> The spin-orbit coupling (SOC) between  $S_n$  ( $n = 1,2$ ) and  $T_n$  ( $n = 1-6$ ) states were calculated with PySOC at the TD-DFT level of theory using the M062X functional and the def2svp basis set with PySOC.

## Devices fabrication

The involved functional layer materials except for emitters were gained through commercial sources. The ITO glass substrates with a certain resistance were cleaned in different detergents, and handled in ozone atmosphere for 30 min. For all the devices, the functional layer materials were fabricated with a pressure below  $1 \times 10^{-4}$  Pa. Each device possesses an effective light-emitting area of  $3.0 \times 3.0 \text{ mm}^2$ . Current density-voltage-luminance ( $J$ - $V$ - $L$ ) curves and electroluminescence (EL) spectra were recorded on Keithley 2400 SMU and a Konica Minolta Chroma Meter CS-200 and HAMAMATSU C9920-11, respectively. All relevant device measurements were operated in the air without further encapsulations. The forward viewing external quantum efficiency was calculated by using the current efficiency, EL spectra and human photopic sensitivity.

## 3. Syntheses

### General procedure for syntheses of NBO-mBr and NBO-pBr

**NBO-pBr** was synthesized following the literature method.<sup>6</sup> **NBO-mBr** was prepared according to the procedure in Scheme S1.



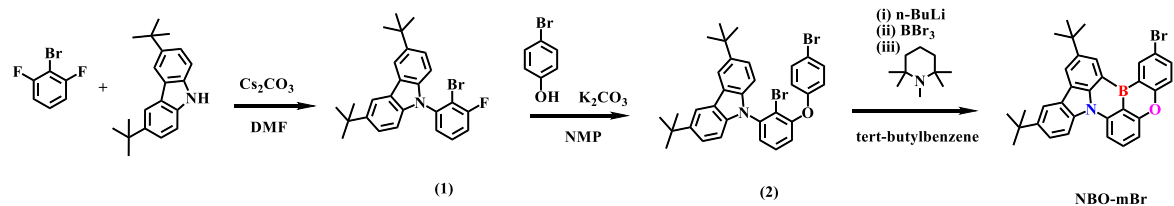

**Scheme S1.** Synthesis of **NBO-mBr**.

**9-(2-bromo-3-fluorophenyl)-3,6-di-tert-butyl-9H-carbazole (1):** A mixture of 2-bromo-1,3-difluorobenzene (10.0 g, 51.8 mmol), 3,6-di-tert-butyl-9H-carbazole (12.8 g, 45.8 mmol), and  $\text{Cs}_2\text{CO}_3$  (27.2 g, 83.3 mmol) in dry DMF (150 mL) was stirred at 150 °C for 12 h. After cooling to room temperature, the reaction mixture was added into a large amount of water and then extracted with  $\text{CH}_2\text{Cl}_2$ . The combined organic layer was washed with water and dried over anhydrous  $\text{Na}_2\text{SO}_4$ . After filtration and evaporation, the crude product was purified by column chromatography to yield intermediate **(1)**, which was put into the following reaction without characterization.

**9-(2-bromo-3-(4-bromophenoxy)phenyl)-3,6-di-tert-butyl-9H-carbazole (2):** A mixture of compound **(1)** (10.0 g, 22.1 mmol), 4-bromophenol (10.4 g, 60.2 mmol) and  $\text{K}_2\text{CO}_3$  (8.3 g, 60.1 mmol) was dissolved in anhydrous N-methylpyrrolidinone (120 mL). The mixture was stirred at 180 °C under a nitrogen atmosphere for 24 h. After cooling to room temperature, the reaction mixture was poured into ice water and the precipitate was filtered and washed with water. The crude product was extracted with toluene and dried over  $\text{MgSO}_4$ , and purified by column chromatography. **(2):**  $^1\text{H}$  NMR (400 MHz,  $\text{CDCl}_3$ )  $\delta$  8.62 (s, 2H), 8.00 – 7.84 (m, 5H), 7.73 – 7.68 (m, 1H), 7.55 (d,  $J = 8.1$  Hz, 1H), 7.49 (d,  $J = 8.0$  Hz, 2H), 7.42 (d,  $J = 8.9$  Hz, 2H), 1.93 (d,  $J = 1.5$  Hz, 18H).

**NBO-mBr:** To a solution of compound **(2)** (2.5 g, 4.1 mmol) in dry tert-butylbenzene (200 mL) was slowly added n-BuLi (2.5 M solution in hexane, 2.0 mL, 5.0 mmol) at -20 °C. After reacting for 2 h at room temperature,  $\text{BBr}_3$  (0.6 mL, 6.2 mmol) was slowly added at -20 °C, and then the mixture was stirred at room temperature for 2 h. After addition of 1,2,2,6,6-pentamethylpiperidine (2.9 mL, 16.5

mmol) at 0 °C, the reaction mixture was further stirred at 130 °C for 14 h. After cooling to room temperature, the reaction mixture was carefully quenched by adding methanol, then the solvent was removed in vacuo. The mixture was extracted with dichloromethane and the organic phase was washed with water. After removing dichloromethane, and mixture was purified by column chromatography to give pure **NBO-mBr**:  $^1\text{H NMR}$  (500 MHz,  $\text{CDCl}_3$ )  $\delta$  8.81 (d,  $J = 2.5$  Hz, 1H), 8.74 (s, 1H), 8.42 (s, 1H), 8.25 (d,  $J = 8.7$  Hz, 1H), 8.20 – 8.11 (m, 2H), 7.85 (t,  $J = 8.2$  Hz, 1H), 7.69 (dd,  $J = 8.6, 2.4$  Hz, 1H), 7.59 (dd,  $J = 8.7, 2.1$  Hz, 1H), 7.36 (d,  $J = 8.9$  Hz, 1H), 7.21 (s, 1H), 1.57 (s, 9H), 1.45 (s, 9H).

### General procedure for syntheses of **NBO-mSAF** and **NBO-pSAF**

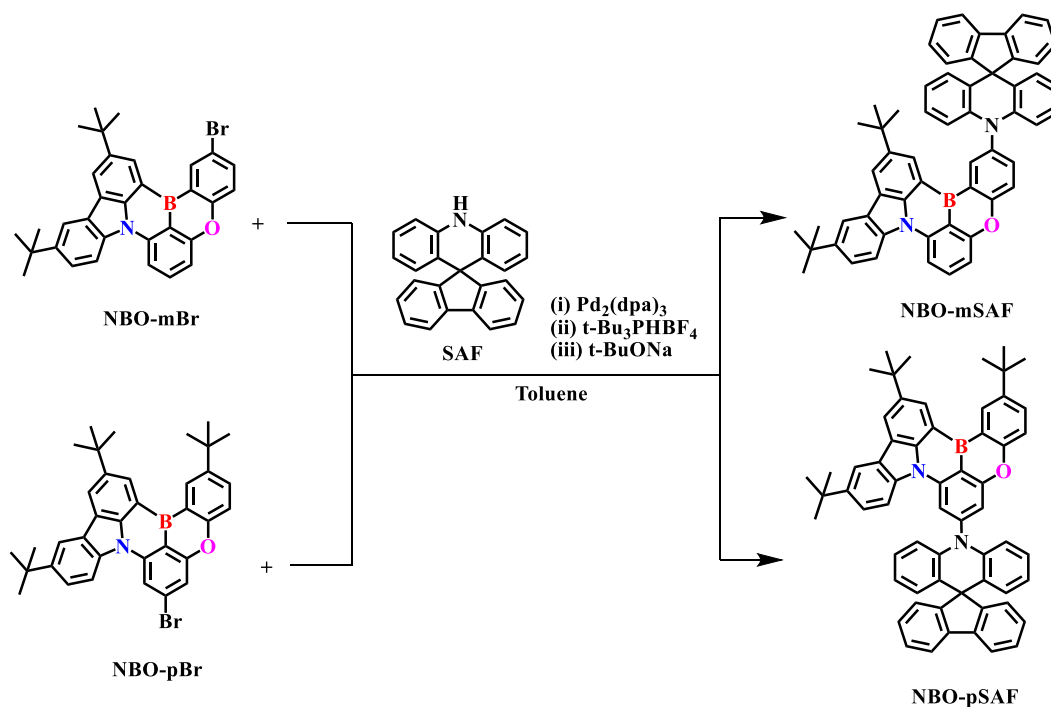

**Scheme S2.** Synthesis of **NBO-mSAF** and **NBO-pSAF**.

A mixture of **NBO-mBr** (500.0 mg, 0.9 mmol) or **NBO-pBr** (500.0 mg, 0.9 mmol), 10H-spiro[acridine 9,9'-fluorene] (0.8 mmol),  $\text{Pd}_2(\text{dba})_3$  (46.0 mg, 0.05 mmol),  $t\text{-Bu}_3\text{PHBF}_4$  (32.0 mg, 0.1 mmol),  $t\text{-BuONa}$  (167 mg, 1.7 mmol) and 50 mL anhydrous toluene in a prewired 100 mL flask was stirred at 110°C under nitrogen atmosphere for 12 h. After the confirmation of TLC tracking reaction, the solvent was removed by vacuum distillation. The mixture was extracted with dichloromethane and

the organic phase was washed with water. After the dichloromethane was removed, the mixture was purified by column chromatography (PE: DCM = 10:1) to obtain the crude product and finally recrystallized from CH<sub>2</sub>Cl<sub>2</sub>/methanol to give the yellow powder as pure product.

**NBO-mSAF:** yield 45.2%. <sup>1</sup>H NMR (400 MHz, CDCl<sub>3</sub>) δ 8.96 (s, 1H), 8.85 (s, 1H), 8.52 (s, 1H), 8.40 (d, *J* = 8.8 Hz, 1H), 8.31 (t, *J* = 8.3 Hz, 2H), 8.02 (t, *J* = 8.2 Hz, 1H), 7.92 (d, *J* = 8.6 Hz, 1H), 7.79-7.89 (m, 3H), 7.71 (d, *J* = 8.8 Hz, 1H), 7.55 (d, *J* = 7.5 Hz, 2H), 7.44 (t, *J* = 7.8 Hz, 3H), 7.34 (t, *J* = 7.4 Hz, 2H), 7.02 – 6.94 (t, *J* = 8.8 Hz, 2H), 6.68 – 6.57 (m, 4H), 6.50 (d, *J* = 7.8 Hz, 2H), 1.58 (s, 9H), 1.55 (s, 9H). <sup>13</sup>C NMR (126 MHz, CDCl<sub>3</sub>) δ 159.14, 159.05, 156.68, 145.70, 144.95, 142.44, 142.02, 141.78, 139.33, 138.22, 137.34, 136.03, 135.52, 134.42, 129.06, 128.49, 127.82, 127.64, 127.34, 126.80, 125.78, 125.00, 124.75, 124.25, 121.75, 121.04, 120.72, 119.98, 117.32, 114.89, 114.04, 109.02, 107.79, 77.30, 77.05, 76.79, 56.99, 35.11, 34.85, 32.10, 31.84, 1.05, 0.03. MALDI-HRMS (C<sub>57</sub>H<sub>45</sub>BN<sub>2</sub>O, *m/z*): [M]<sup>+</sup> calculated: 784.3625, found: 784.3605.

**NBO-pSAF:** yield 47.8%. <sup>1</sup>H NMR (400 MHz, CDCl<sub>3</sub>) δ 9.09 (s, 1H), 9.00 (s, 1H), 8.55 (s, 1H), 8.36 (s, 1H), 8.31(t, *J* = 7.1 Hz, 2H), 7.87 (d, *J* = 7.1 Hz, 3H), 7.68 – 7.55 (m, 4H), 7.51 (s, 1H), 7.45 (t, *J* = 7.4 Hz, 2H), 7.37 (t, *J* = 7.4 Hz, 2H), 7.00 – 6.91 (t, *J* = 6.9 Hz, 2H), 6.65 (dd, *J* = 14.1, 7.7 Hz, 4H), 6.51 (d, *J* = 7.8 Hz, 2H), 1.70 (s, 9H), 1.59 (s, 9H), 1.52 (s, 9H). <sup>13</sup>C NMR (126 MHz, CDCl<sub>3</sub>) δ 161.50, 157.95, 156.46, 146.35, 145.97, 145.45, 145.23, 144.40, 142.25, 141.09, 139.35, 138.03, 131.53, 130.75, 129.73, 128.49, 127.81, 127.72, 127.50, 126.93, 125.93, 125.07, 124.91, 124.30, 121.54, 120.91, 120.02, 118.74, 117.57, 117.32, 114.95, 114.07, 111.31, 109.84, 77.31, 77.05, 76.80, 56.96, 35.26, 34.86, 34.70, 32.18, 31.81, 31.66, 1.07, 0.04. MALDI-HRMS (C<sub>61</sub>H<sub>53</sub>BN<sub>2</sub>O, *m/z*): [M]<sup>+</sup> calculated: 840.4251, found: 840.4251.

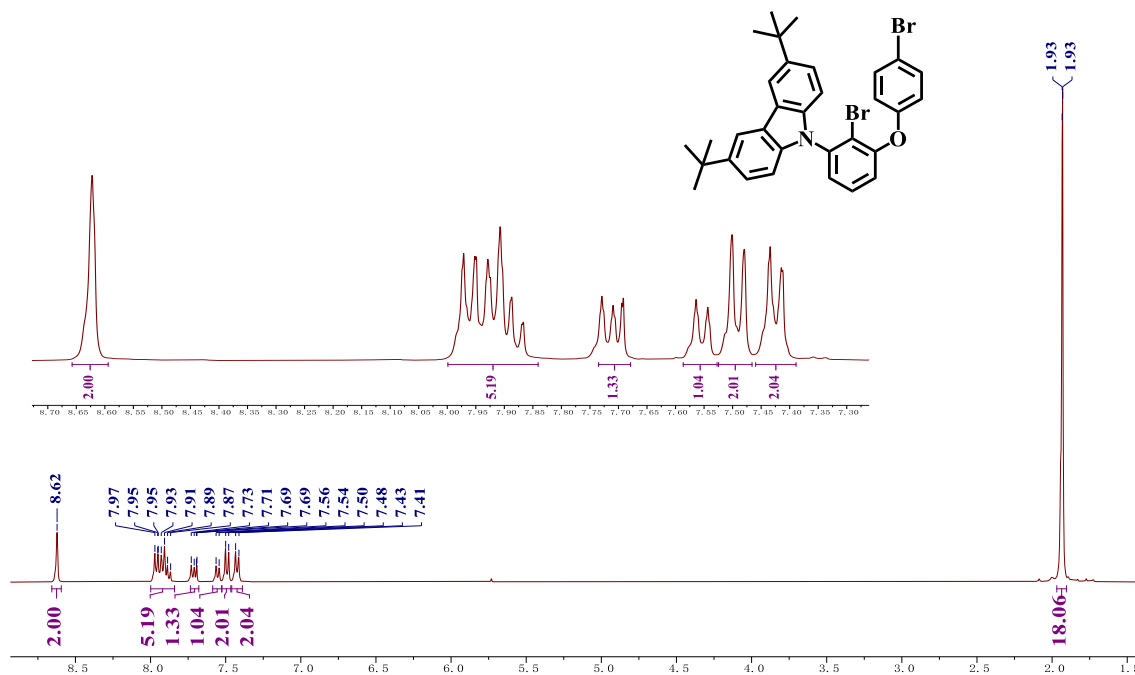

Figure S2. <sup>1</sup>H NMR spectrum of compound (2).

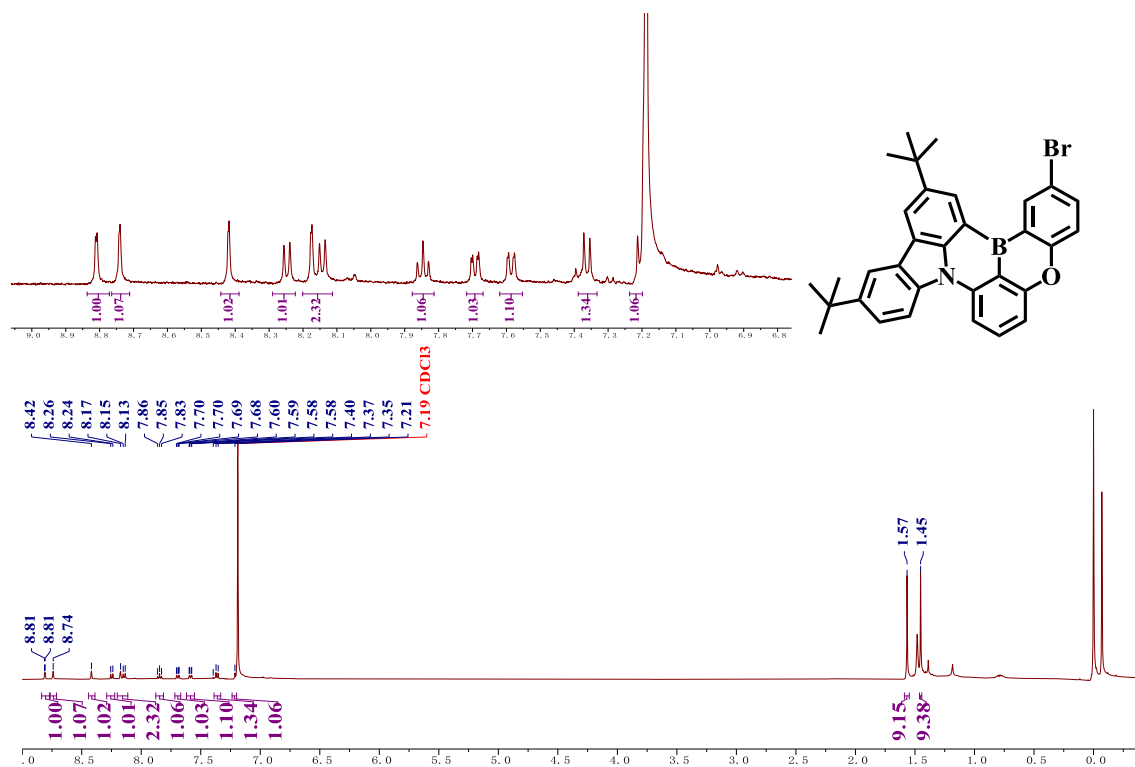

Figure S3. <sup>1</sup>H NMR spectrum of NBO-mBr.

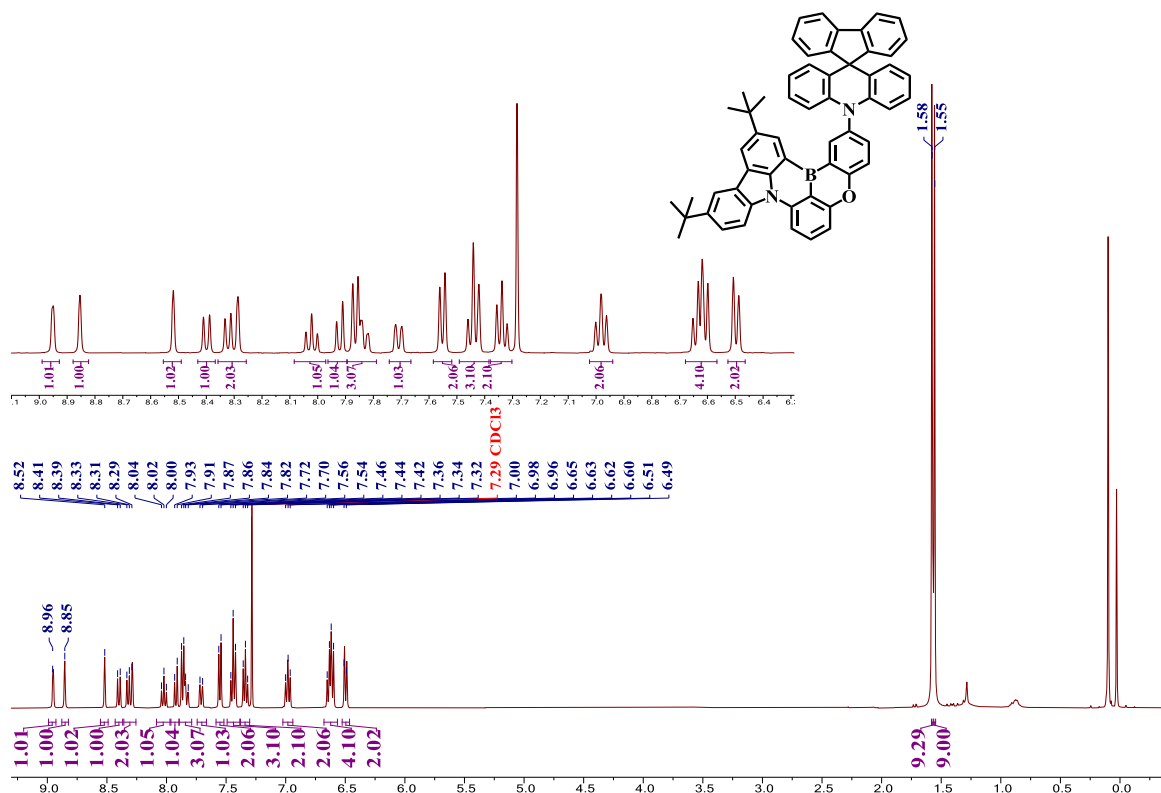

**Figure S4. <sup>1</sup>H NMR spectrum of NBO-mSAF.**

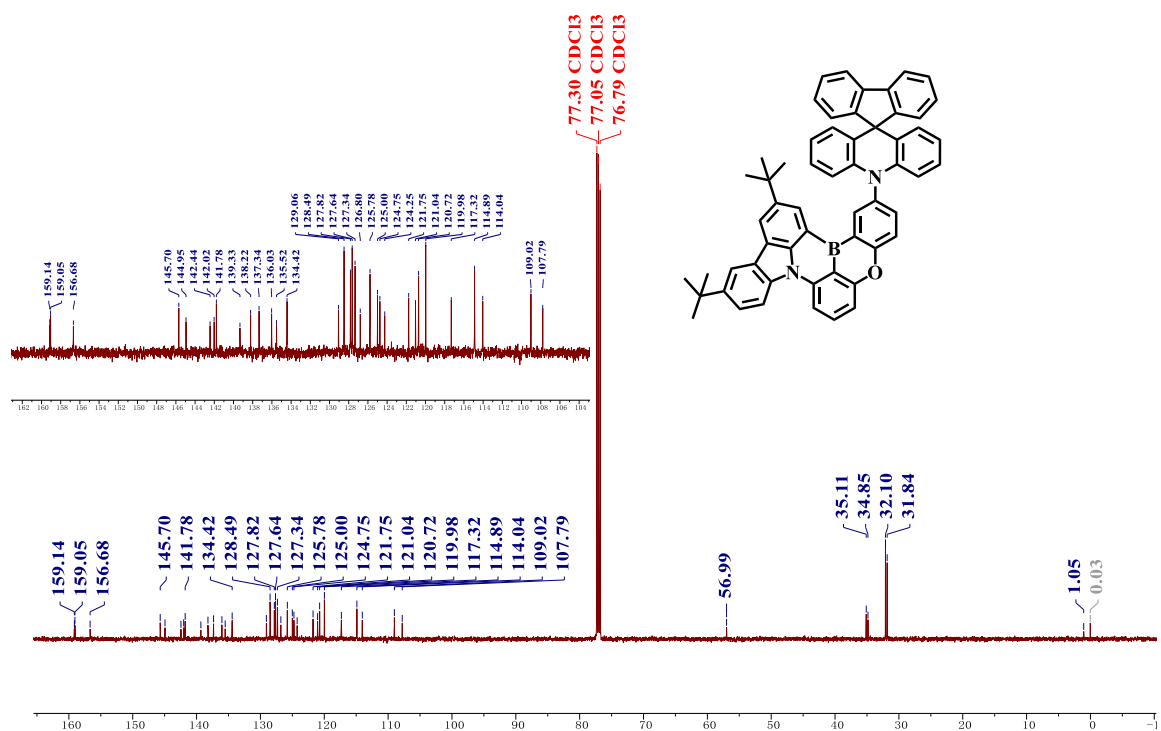

**Figure S5. <sup>13</sup>C NMR spectrum of NBO-mSAF.**

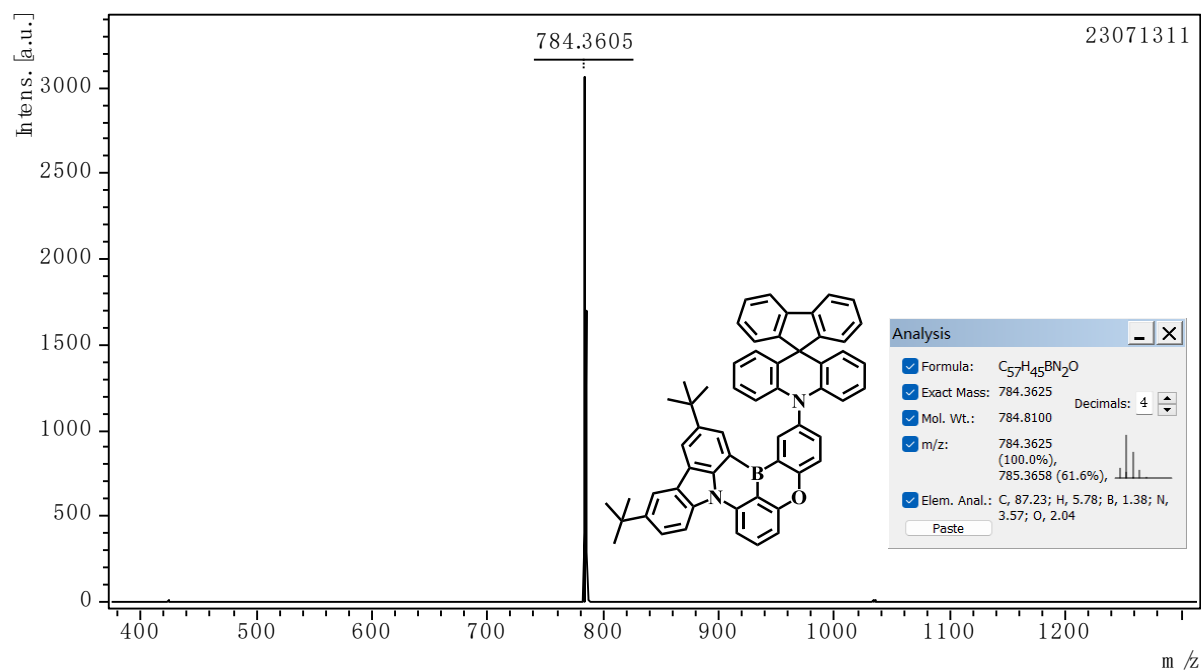

Figure S6. Mass spectrum of NBO-mSAF.

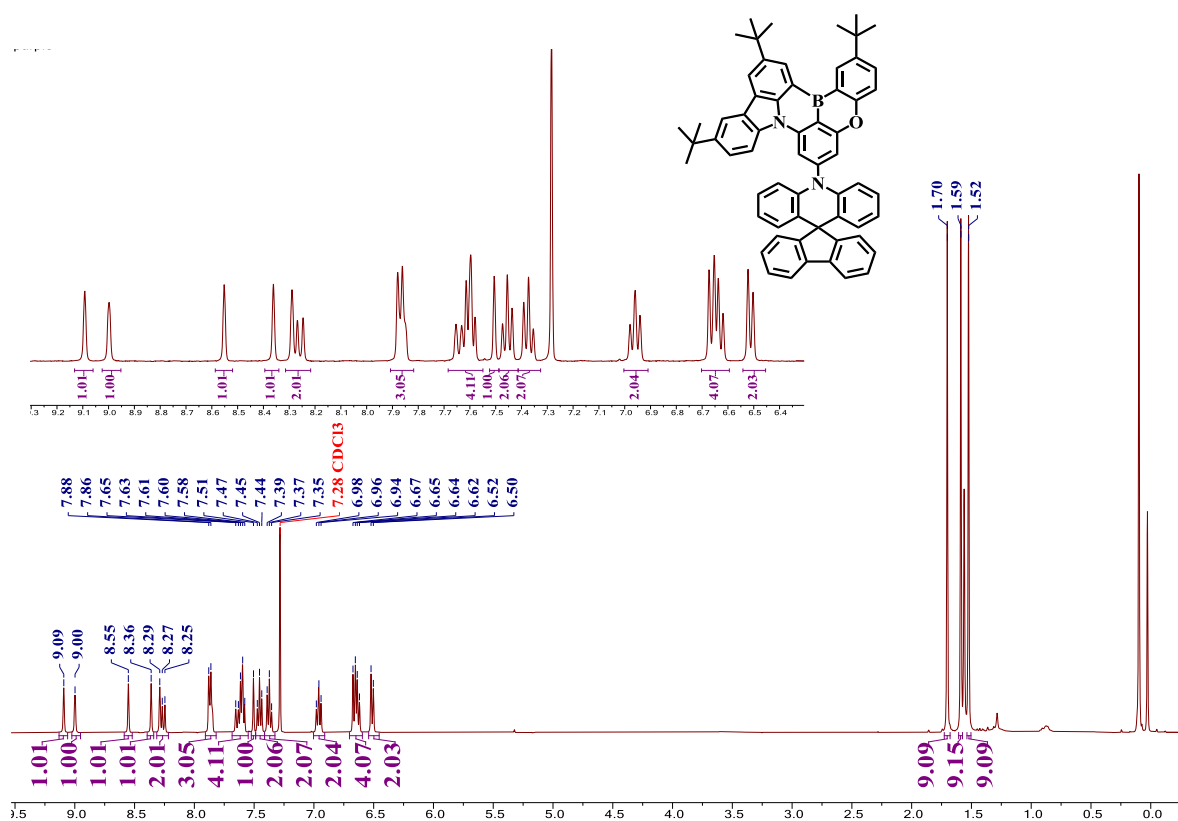

Figure S7.  $^1H$  NMR spectrum of NBO-pSAF.

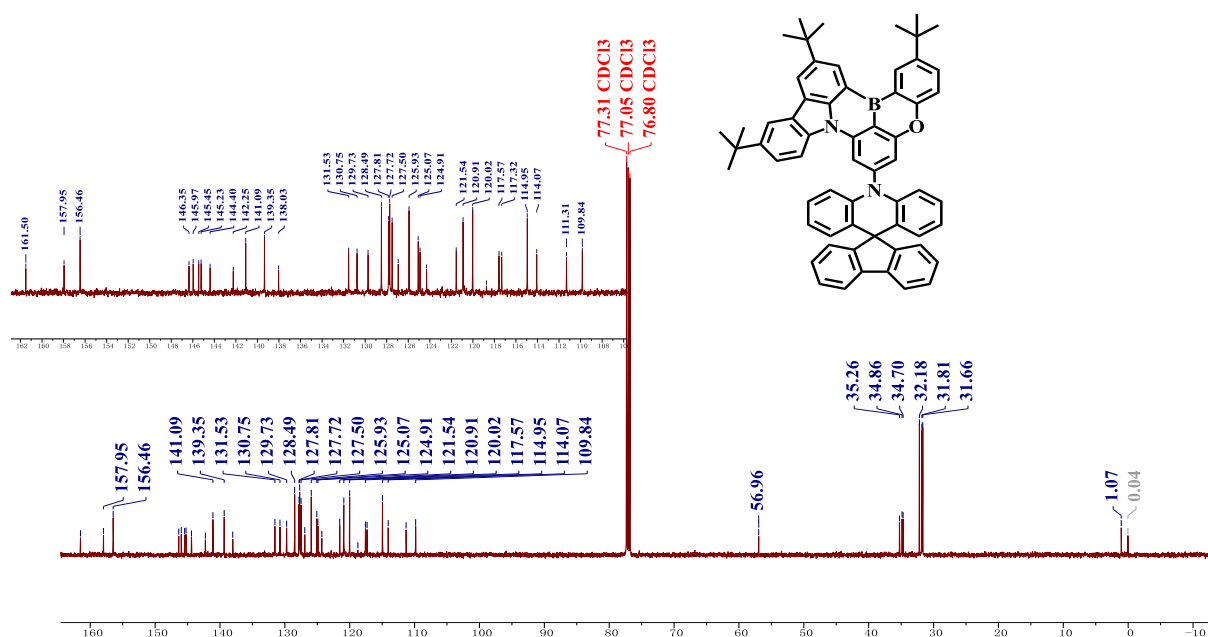

**Figure S8.**  $^{13}\text{C}$  NMR spectrum of NBO-pSAF.

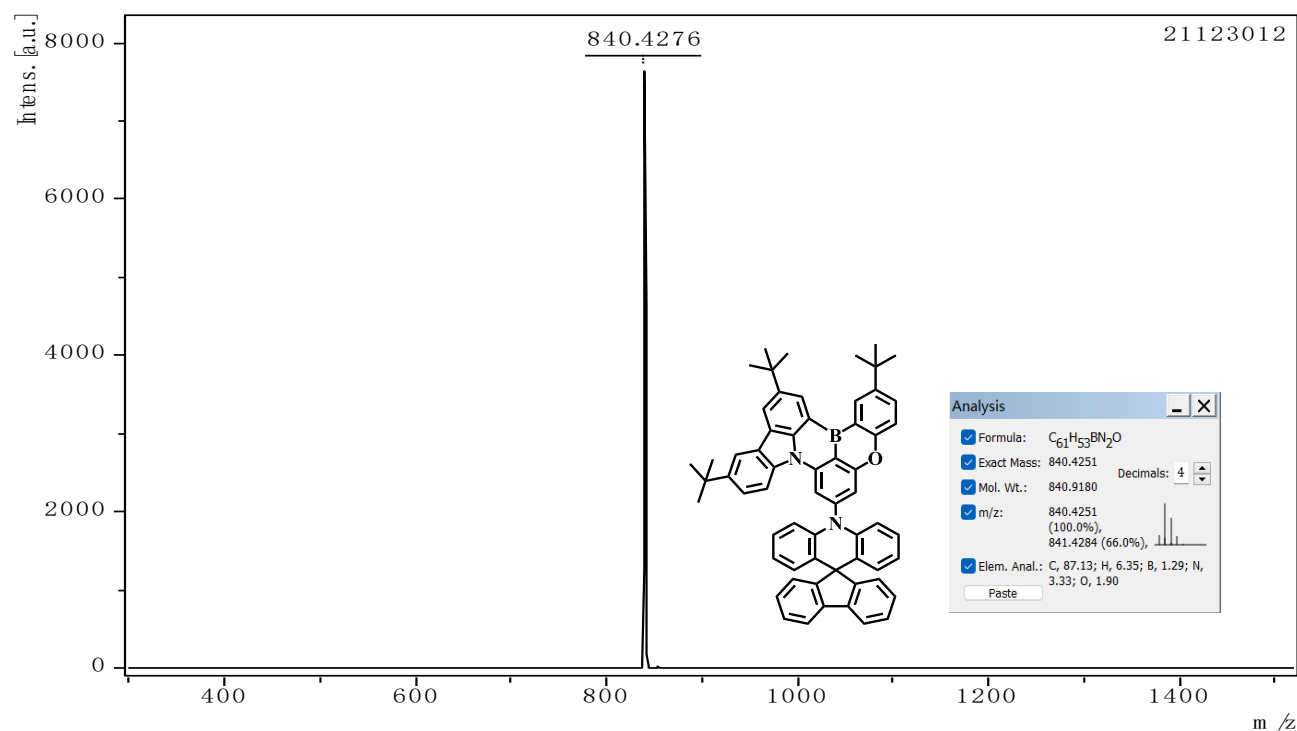

**Figure S9.** Mass spectrum of NBO-pSAF.

## 4. Supplementary figures

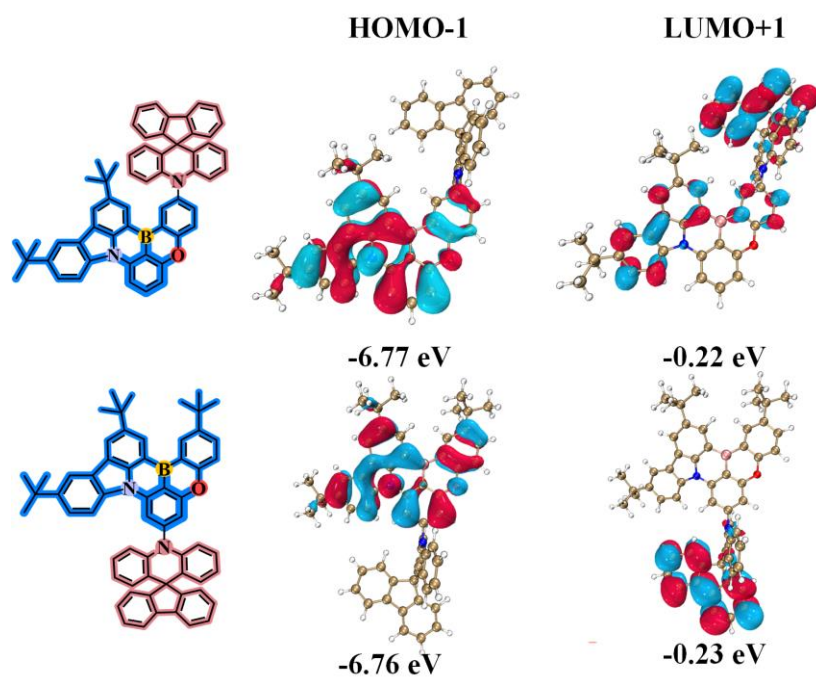

**Figure S10.** Orbital distribution and energy levels of HOMO-1 and LUMO+1 of NBO-mSAF and NBO-pSAF.

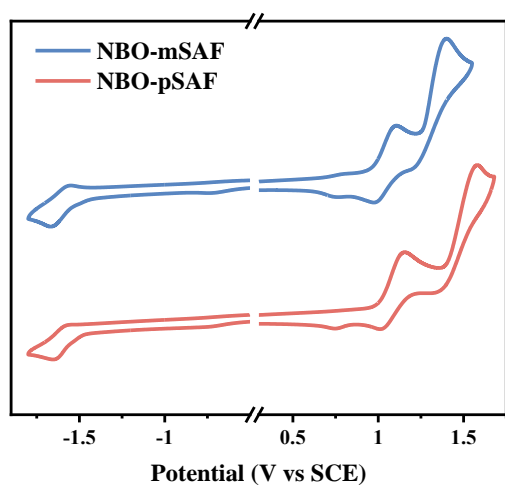

**Figure S11.** Cyclic voltammograms of NBO-mSAF and NBO-pSAF in dilute DCM (anodic) and DMF (cathodic) solutions.



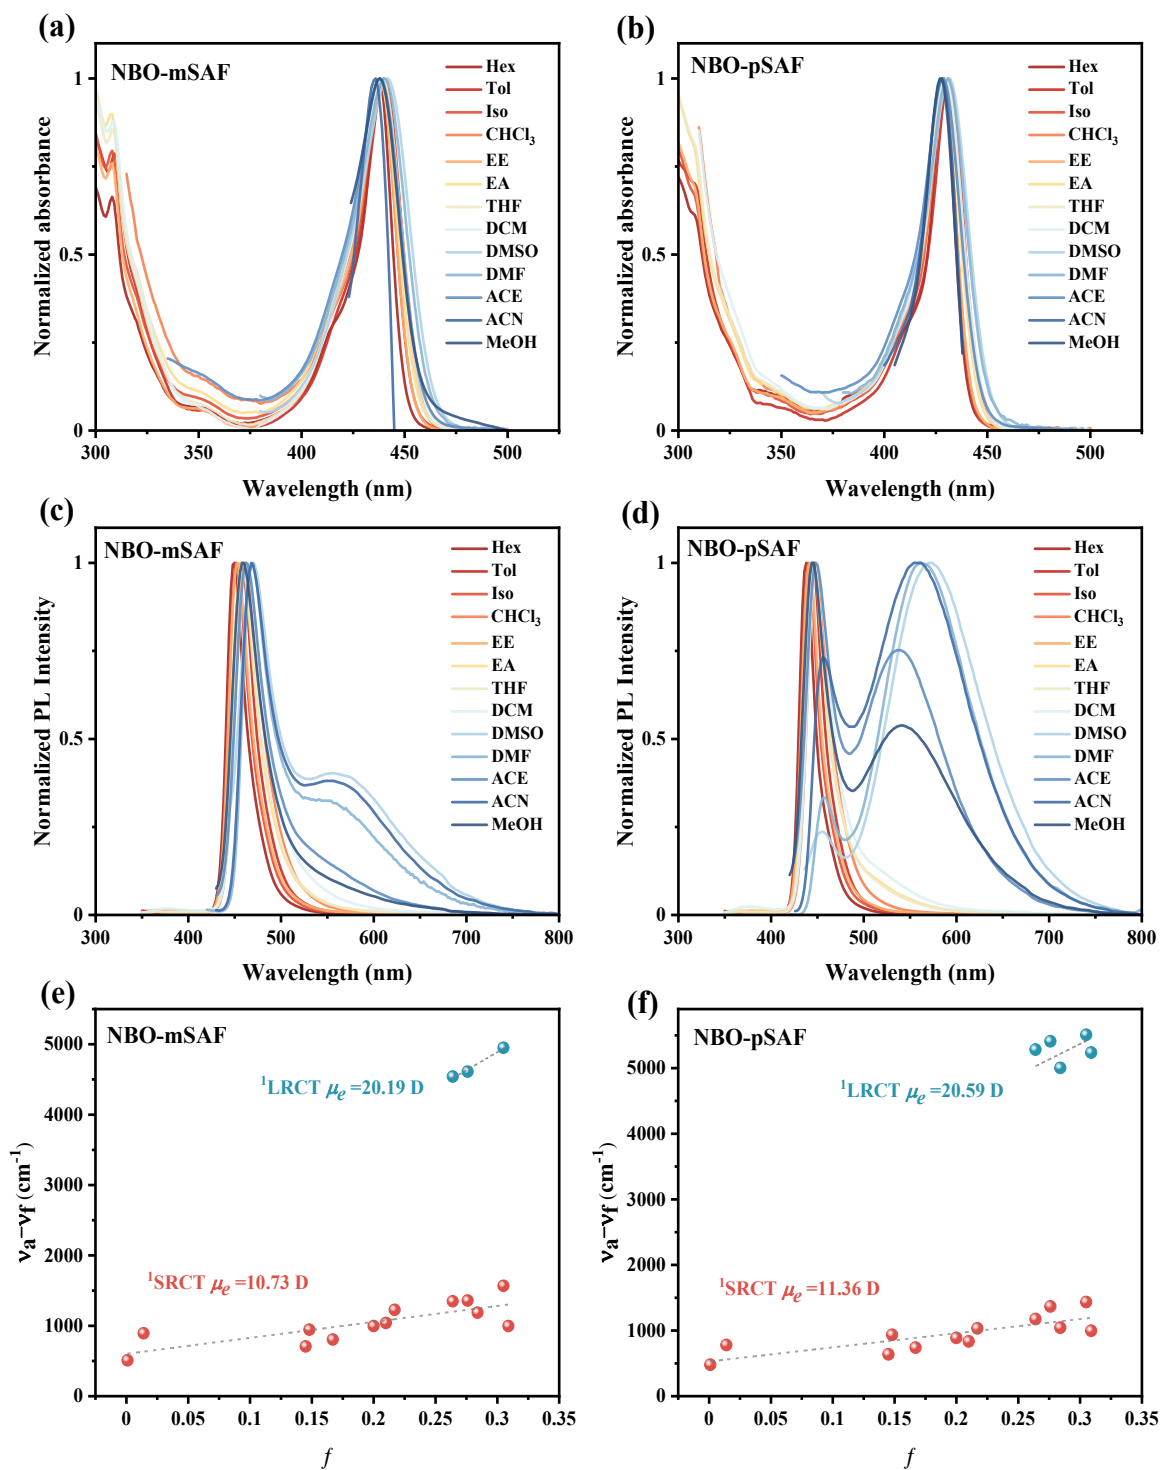

**Figure S12.** The absorption spectra (a, b), emission spectra (c, d) of **NBO-mSAF** and **NBO-pSAF** in different polar solvents and the linear relationship between solvent oriented polarizability ( $f$ ) and Stokes shift ( $\nu_a - \nu_f$ ) (e, f).

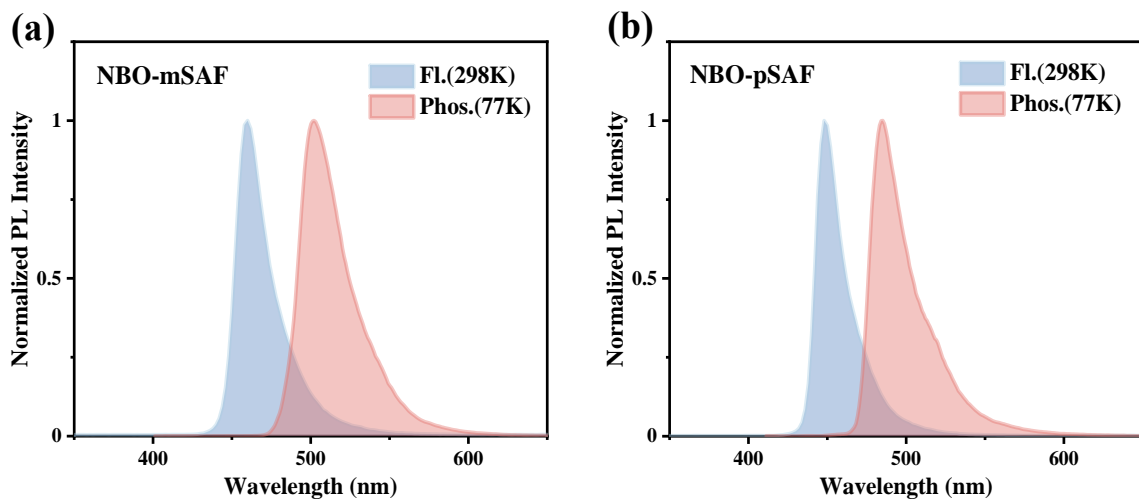

**Figure S13.** Fluorescence (300K) and phosphorescence (77K) spectra of (a) NBO-mSAF and (b) NBO-pSAF in dilute 2-MeTHF solution.

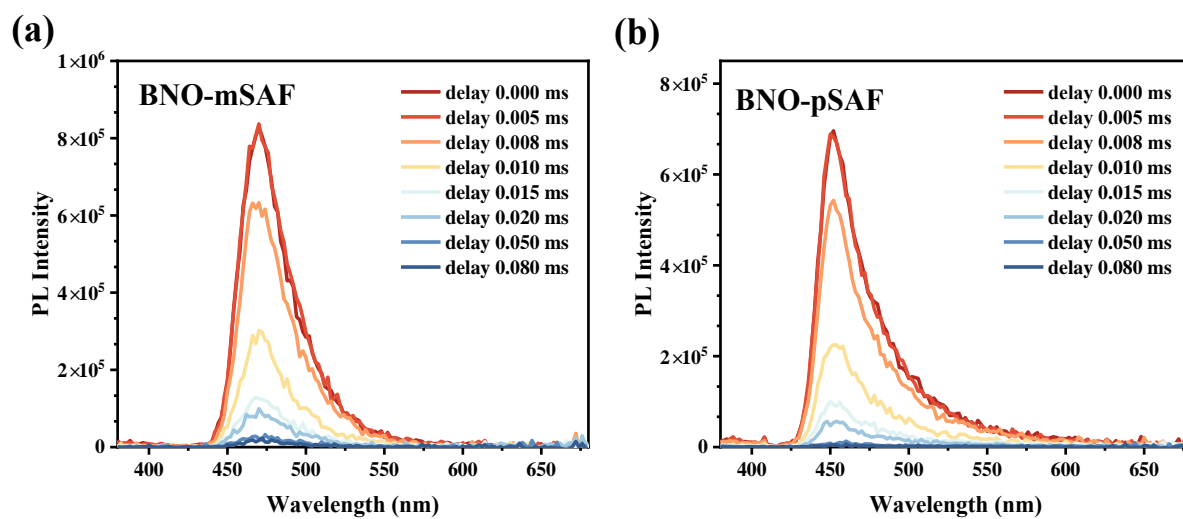

**Figure S14.** The prompt and delayed emission spectra for (a) NBO-mSAF and (b) NBO-pSAF in doped films (6 wt% in 26DCzPPy host).

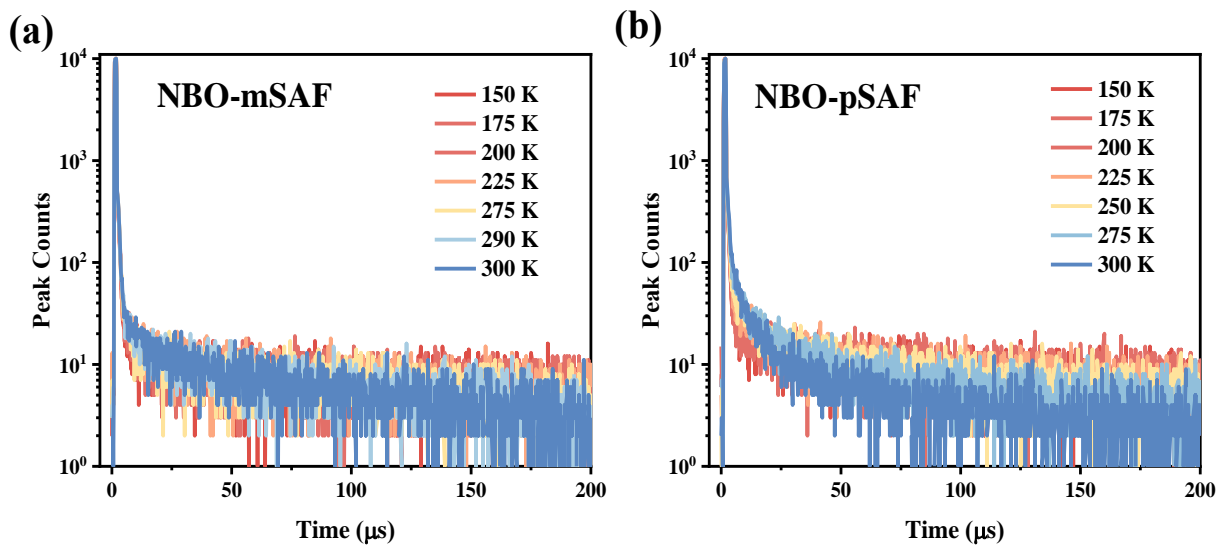

**Figure S15.** Temperature dependent transient PL decay curves for (a) **NBO-mSAF** and (b) **NBO-pSAF** in doped films (6 wt% in 26DCzPPy host).

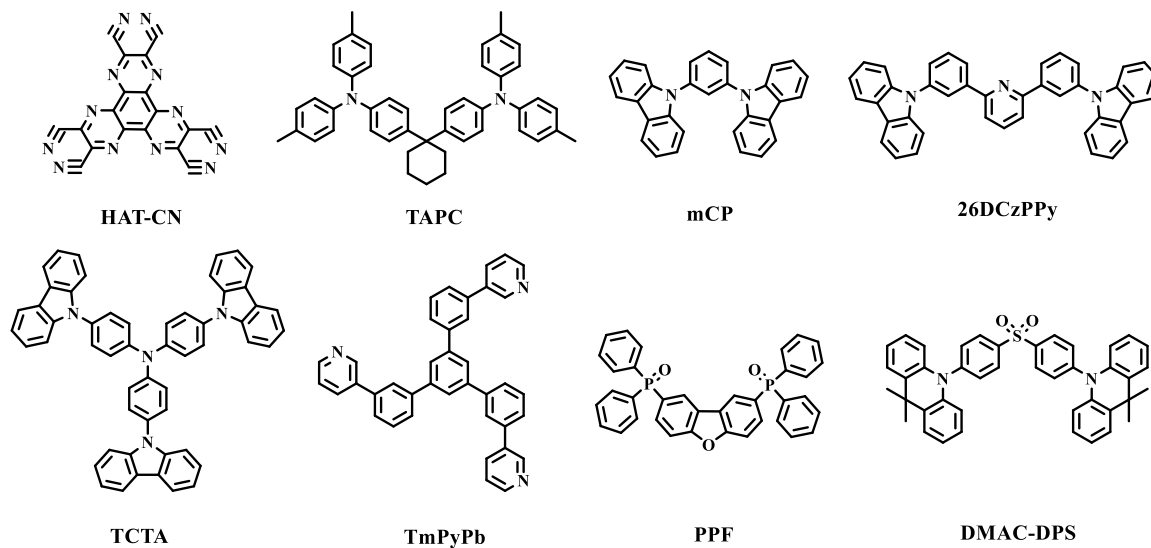

**Figure S16.** Chemical structures of the materials utilized in present OLED fabrication.

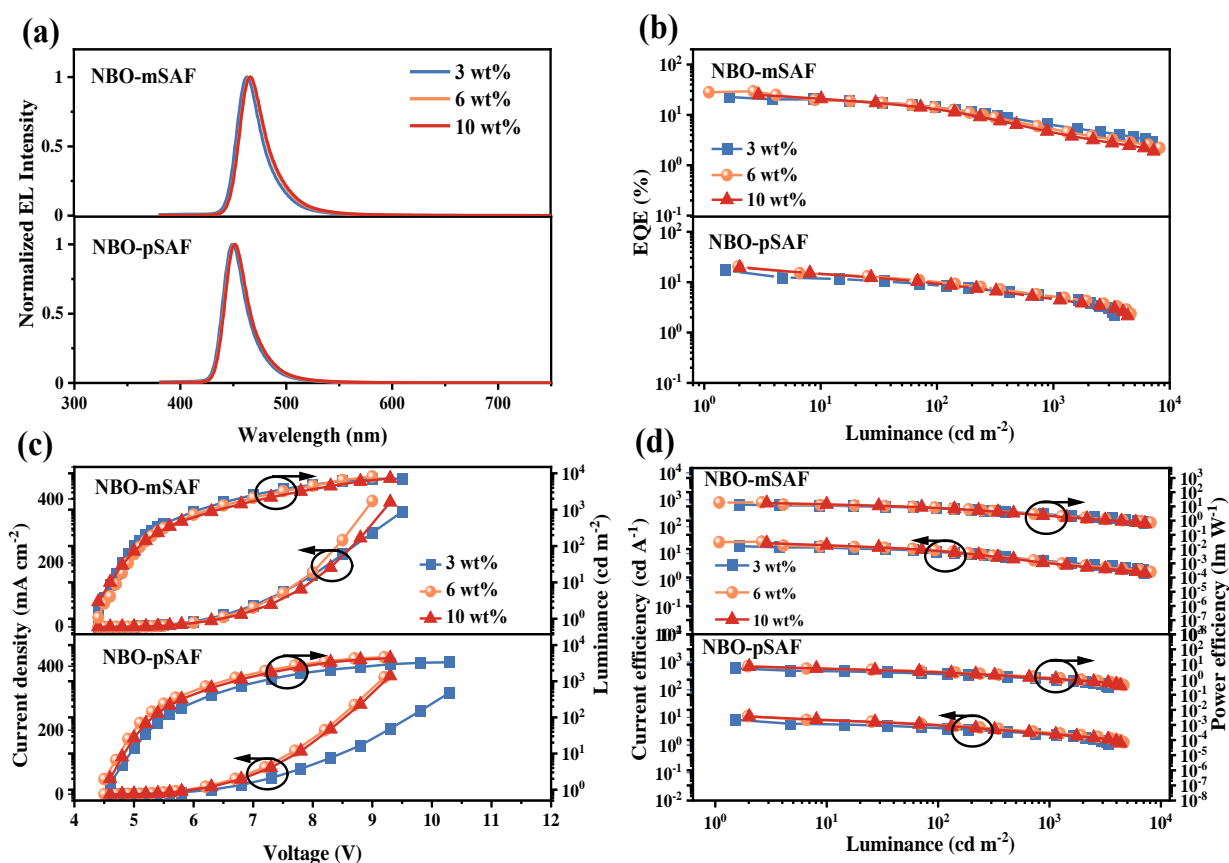

**Figure S17.** Doping concentration optimization for NBO-mSAF and NBO-pSAF devices with 26DCzPPy as host. (a) EL spectra; (b) EQE-Luminance curves; (c) Current density-voltage-luminance; (d) Current efficiency-luminance-Power efficiency curves.

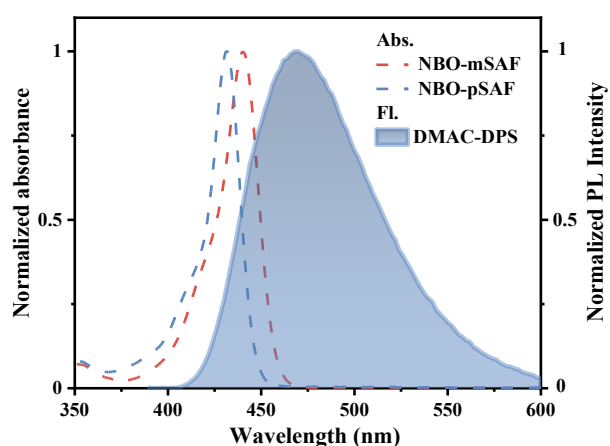

**Figure S18.** Comparison between fluorescence spectra (FL, measured at 300 K) of the sensitizer (DMAC-DPS) and UV-vis absorption spectra (Abs., measured at 300 K) of the emitters in toluene solution.

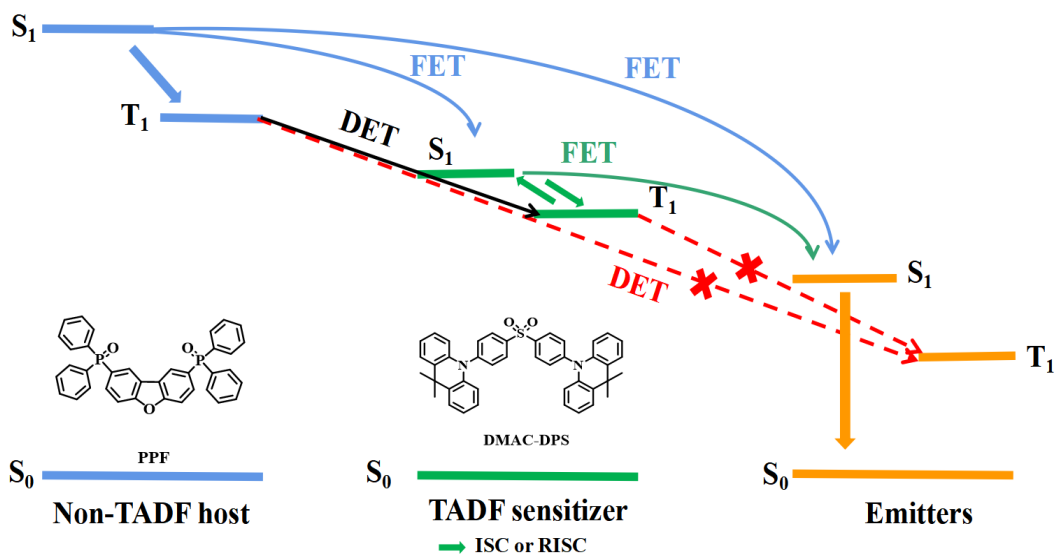

**Figure S19.** The energy transfer process for HF-devices.

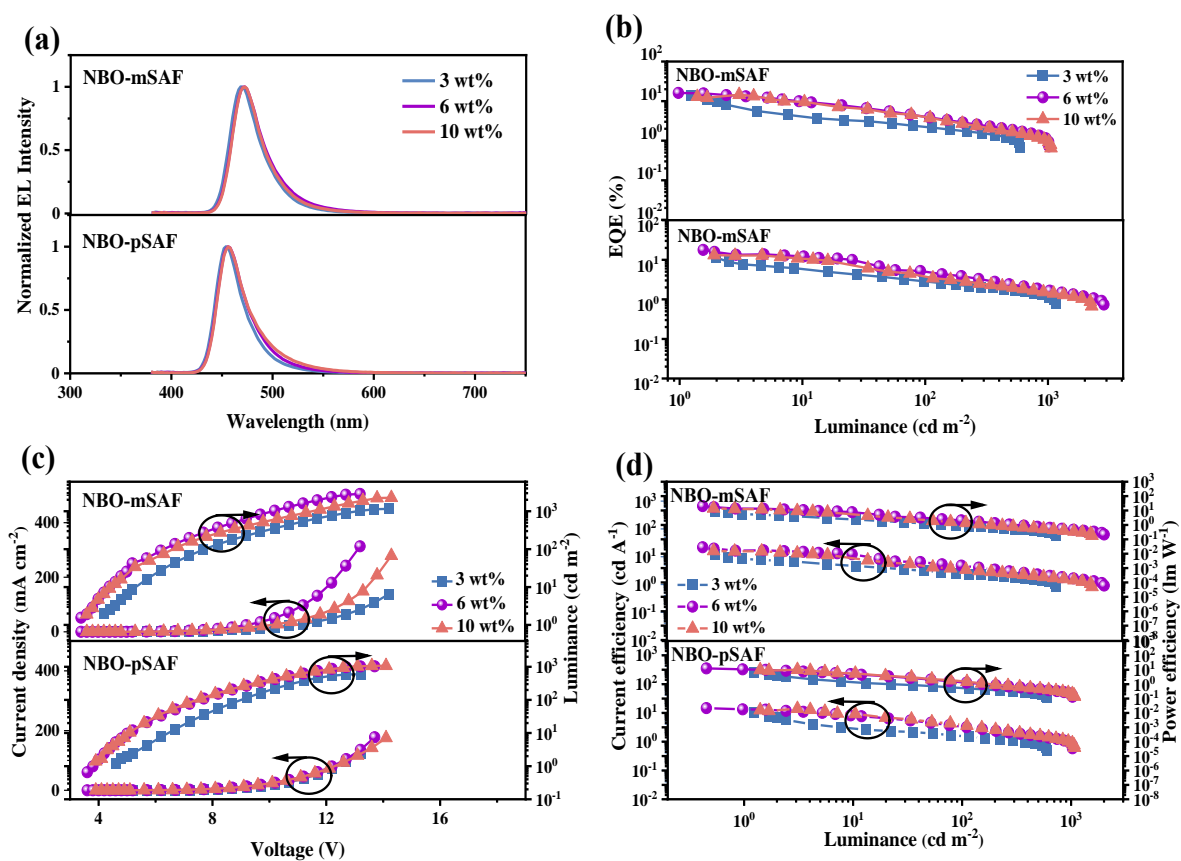

**Figure S20.** Electroluminescent performance of the sensitizer-free devices at different doping concentrations in PPF host. (a) EL spectra; (b) EQE-Luminance curves; (c) Current density-voltage-luminance; (d) Current efficiency-luminance-Power efficiency curves.

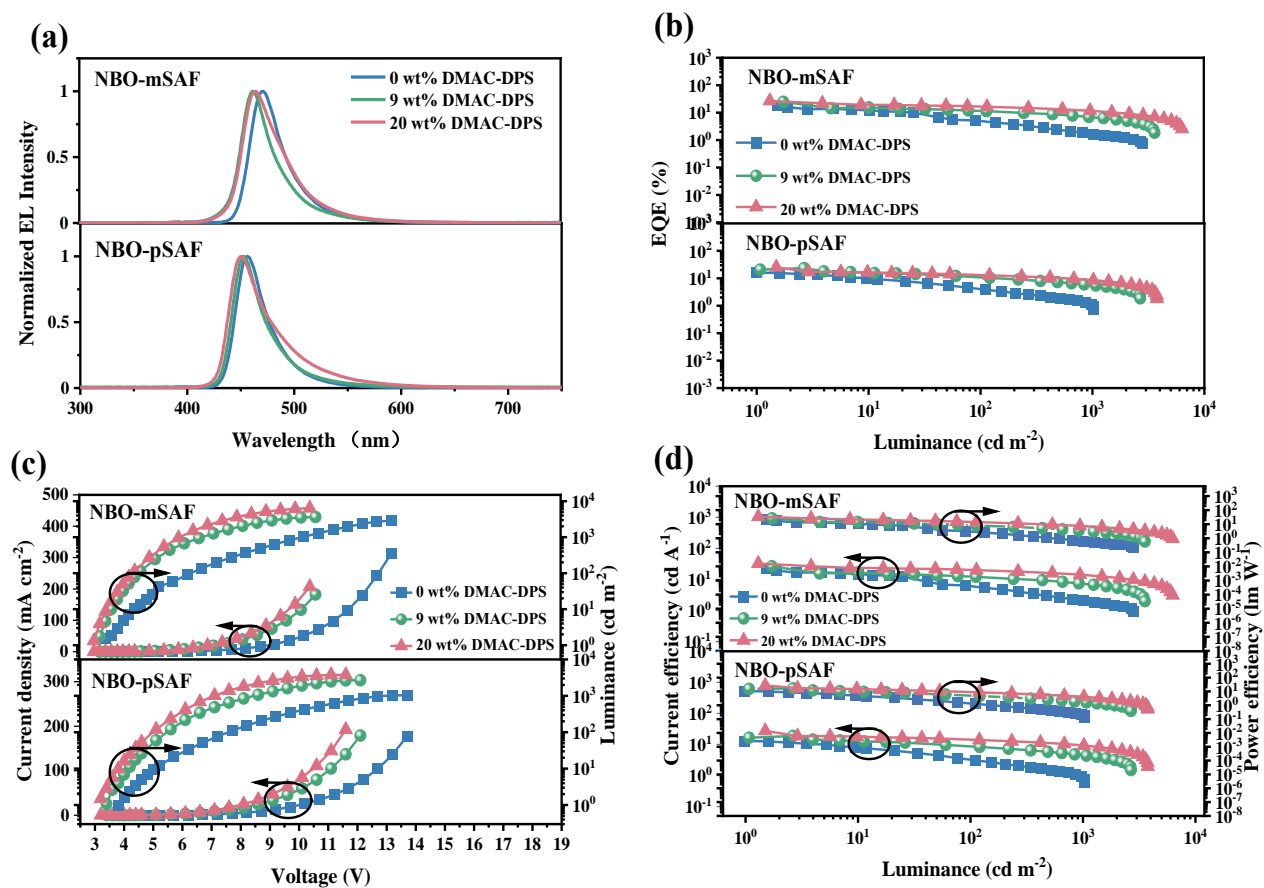

**Figure S21.** Electroluminescent performance of sensitizer at different doping concentrations (sensitizer: DMAC-DPS). (a) EL spectra; (b) EQE-Luminance curves; (c) Current density-voltage-luminance; (d) Current efficiency-luminance-Power efficiency curves.

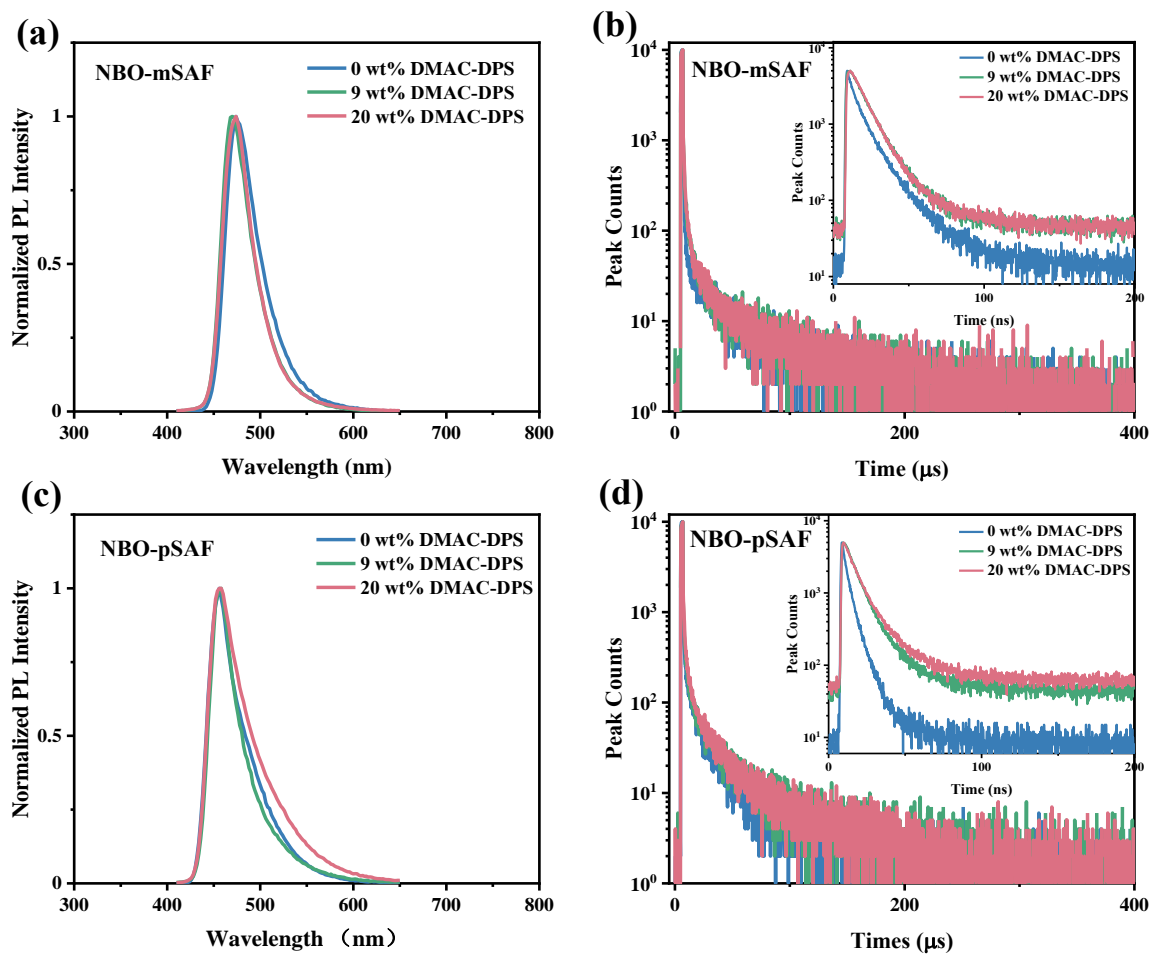

**Figure S22.** The normalized PL spectra (a, c) and transient photoluminescence decay curves (b, d) of sensitizer at different doping concentrations (sensitizer: DMAC-DPS) of NBO-mSAF and NBO-pSAF.

## 5. Supplementary tables

**Table S2.** Summary of TD-DFT data for **NBO-mSAF** and **NBO-pSAF** at M062X/def2svp level.

| Compound                       | Transition                     | Wavelength (nm) | Energy (eV) | Oscillator Strength                                                                    | Coefficient of Orbital |
|--------------------------------|--------------------------------|-----------------|-------------|----------------------------------------------------------------------------------------|------------------------|
| <b>NBO-mSAF</b>                | S <sub>0</sub> -S <sub>1</sub> | 355             | 3.49        | 0.3859                                                                                 | HOMO-1→LUMO (92.4%)    |
|                                | S <sub>0</sub> -S <sub>2</sub> | 336             | 3.68        | 0.0031                                                                                 | HOMO→LUMO (86.3%)      |
|                                | S <sub>0</sub> -T <sub>1</sub> | 422             | 2.94        | 0.0000                                                                                 | HOMO-1→LUMO (88.2%)    |
|                                | S <sub>0</sub> -T <sub>2</sub> | 377             | 3.29        | 0.0000                                                                                 | HOMO-3→LUMO (64.1%)    |
|                                |                                |                 |             |                                                                                        | HOMO-3→LUMO+2 (16.3%)  |
|                                |                                |                 |             |                                                                                        | HOMO-3→LUMO+1 (6.1%)   |
| S <sub>0</sub> -T <sub>3</sub> | 350                            | 3.53            | 0.0000      | HOMO-2→LUMO+1 (54.9%)                                                                  |                        |
|                                |                                |                 |             | HOMO-2→LUMO+2 (17.9%)<br>HOMO-4→LUMO+1 (5.3%)                                          |                        |
| S <sub>0</sub> -T <sub>4</sub> | 345                            | 3.59            | 0.0000      | HOMO→LUMO (50.8%)<br>HOMO→LUMO+4 (10.9%)<br>HOMO-5→LUMO (5.9%)                         |                        |
| <b>NBO-pSAF</b>                | S <sub>0</sub> -S <sub>1</sub> | 353             | 3.51        | 0.3691                                                                                 | HOMO-1→LUMO (94.6%)    |
|                                | S <sub>0</sub> -S <sub>2</sub> | 340             | 3.65        | 0.0170                                                                                 | HOMO→LUMO (82.4%)      |
|                                |                                |                 |             |                                                                                        | HOMO→LUMO+2 (5.7%)     |
|                                | S <sub>0</sub> -T <sub>1</sub> | 420             | 2.95        | 0.0000                                                                                 | HOMO-1→LUMO (89.2%)    |
|                                | S <sub>0</sub> -T <sub>2</sub> | 376             | 3.30        | 0.0000                                                                                 | HOMO-3→LUMO (64.8%)    |
|                                |                                |                 |             |                                                                                        | HOMO-3→LUMO+2 (20.8%)  |
|                                | S <sub>0</sub> -T <sub>3</sub> | 350             | 3.54        | 0.0000                                                                                 | HOMO-2→LUMO+1 (72.3%)  |
| HOMO-5→LUMO+1 (7.0%)           |                                |                 |             |                                                                                        |                        |
| S <sub>0</sub> -T <sub>4</sub> | 349                            | 3.55            | 0.0000      | HOMO-4→LUMO (40.1%)                                                                    |                        |
|                                |                                |                 |             | HOMO→LUMO (25.5%)                                                                      |                        |
| S <sub>0</sub> -T <sub>5</sub> | 342                            | 3.62            | 0.0000      | HOMO→LUMO (35.3%)<br>HOMO-4→LUMO (23.2%)<br>HOMO-1→LUMO+2 (7.5%)<br>HOMO→LUMO+5 (6.5%) |                        |



**Table S3.** Spin-orbit coupling matrix elements (SOCME) of **NBO-mSAF** and **NBO-pSAF** at M062X/def2svp level.

| $\lambda_{\text{SOC}}$         | <b>NBO-mSAF</b> | <b>NBO-pSAF</b> |
|--------------------------------|-----------------|-----------------|
| T <sub>1</sub> -S <sub>1</sub> | 0.034           | 0.025           |
| T <sub>2</sub> -S <sub>1</sub> | 0.380           | 0.381           |
| T <sub>3</sub> -S <sub>1</sub> | 0.002           | 0.001           |
| T <sub>4</sub> -S <sub>1</sub> | 0.289           | 0.131           |
| T <sub>5</sub> -S <sub>1</sub> | 0.293           | 0.242           |
| T <sub>1</sub> -S <sub>2</sub> | 0.299           | 0.215           |
| T <sub>2</sub> -S <sub>2</sub> | 0.133           | 0.017           |
| T <sub>3</sub> -S <sub>2</sub> | 0.008           | 0.002           |
| T <sub>4</sub> -S <sub>2</sub> | 0.095           | 0.172           |
| T <sub>5</sub> -S <sub>2</sub> | 0.676           | 0.148           |

**Table S4.** Photovoltaic performance parameters in various solvents (n-hexane, toluene, tetrahydrofuran, dichloromethane, N, N-dimethylformamide, acetonitrile).

| Emitter | <b>NBO-mSAF</b>            |           | <b>NBO-pSAF</b>            |           |
|---------|----------------------------|-----------|----------------------------|-----------|
|         | $\lambda_{\text{em}}$ (nm) | FWHM (nm) | $\lambda_{\text{em}}$ (nm) | FWHM (nm) |
| Hex     | 448                        | 28        | 438                        | 18        |
| Tol     | 458                        | 28        | 446                        | 20        |
| THF     | 460                        | 30        | 446                        | 26        |
| DCM     | 464                        | 31        | 450                        | 28        |
| DMF     | 468/552                    | --        | 458/562                    | --        |
| ACN     | 468/556                    | --        | 458/562                    | --        |

**Table S5.** Detailed photophysical data used to calculate the excited state dipole moments ( $\mu_e$ ) of **NBO-mSAF** and **NBO-pSAF**.

| Emitter         | <b>NBO-mSAF</b> |                  |                  |                                   | <b>NBO-pSAF</b>  |                  |                                   |
|-----------------|-----------------|------------------|------------------|-----------------------------------|------------------|------------------|-----------------------------------|
| Solvent         | $f$             | $\lambda_a$ (nm) | $\lambda_f$ (nm) | $\nu_a-\nu_f$ (cm <sup>-1</sup> ) | $\lambda_a$ (nm) | $\lambda_f$ (nm) | $\nu_a-\nu_f$ (cm <sup>-1</sup> ) |
| Hexane          | 0.001           | 438              | 448              | 510                               | 429              | 438              | 479                               |
| Toluene         | 0.014           | 440              | 458              | 893                               | 432              | 446              | 727                               |
| Isopropyl ether | 0.145           | 438              | 452              | 707                               | 428              | 440              | 637                               |
| Chloroform      | 0.148           | 439              | 458              | 945                               | 430              | 448              | 934                               |
| Ethyl ether     | 0.167           | 438              | 454              | 805                               | 428              | 442              | 740                               |
| Ethyl acetate   | 0.200           | 438              | 458              | 997                               | 429              | 446              | 888                               |
| THF             | 0.210           | 439              | 460              | 1040                              | 430              | 446              | 834                               |
| DCM             | 0.217           | 439              | 464              | 1227                              | 430              | 450              | 1033                              |
| DMSO            | 0.264           | 442              | 470/553          | 1348/4541                         | 431              | 454/572          | 1175/5719                         |
| DMF             | 0.276           | 440              | 468/552          | 1360/4611                         | 431              | 458/562          | 1368/5408                         |
| Acetone         | 0.284           | 438              | 462              | 1186                              | 428              | 448/543          | 1043/5002                         |
| Acetonitrile    | 0.305           | 436              | 468/556          | 1568/4950                         | 428              | 458/562          | 1530/5570                         |
| MeOH            | 0.309           | 438              | 458              | 997                               | 427              | 446/550          | 998/5237                          |

**Table S6.** Published photophysical data of the **NBO** emitters.

| Emitter                  | $\Phi_{PL}$<br>[%] | $\Phi_{PF}$<br>[%] | $\Phi_{DF}$<br>[%] | $\tau_{PF}$<br>[ns] | $\tau_{DF}$<br>[ $\mu$ s] | $K_r$<br>[ $10^7$ s <sup>-1</sup> ] | $K_{nr}$<br>[ $10^6$ s <sup>-1</sup> ] | $K_{ISC}$<br>[ $10^7$ s <sup>-1</sup> ] | $K_{RISC}$<br>[ $10^4$ s <sup>-1</sup> ] |
|--------------------------|--------------------|--------------------|--------------------|---------------------|---------------------------|-------------------------------------|----------------------------------------|-----------------------------------------|------------------------------------------|
| <b>NBO</b> <sup>11</sup> | 99.0               | --                 | --                 | 7.7                 | 86.6                      | 11.1                                | --                                     | 1.4                                     | 1.2                                      |

**Table S7.** Summary of the sensitizer-free devices performance of **NBO-mSAF** and **NBO-pSAF** in 26DCzPPy host.

| Emitter         | Doping Ratio | $V_{on}$ [V] | $\lambda_{EL}$ [nm] | FWHM [nm] | $L_{max}$ [cd m <sup>-2</sup> ] | $CE_{max}$ [cd A <sup>-1</sup> ] | $PE_{max}$ [lm W <sup>-1</sup> ] | $EQE_{max/1000}$ [%] | CIE (x,y)     |
|-----------------|--------------|--------------|---------------------|-----------|---------------------------------|----------------------------------|----------------------------------|----------------------|---------------|
| <b>NBO-mSAF</b> | 3 wt%        | 4.4          | 464                 | 27        | 6892                            | 21.6                             | 15.4                             | 25.9/6.4             | (0.133,0.094) |
|                 | 6 wt%        | 4.4          | 466                 | 28        | 8201                            | 27.7                             | 19.3                             | 29.5/6.0             | (0.128,0.114) |
|                 | 10 wt%       | 4.4          | 467                 | 29        | 7282                            | 24.4                             | 17.4                             | 24.9/4.7             | (0.129,0.121) |
| <b>NBO-pSAF</b> | 3 wt%        | 4.6          | 449                 | 25        | 3355                            | 8.2                              | 5.6                              | 17.2/4.9             | (0.149,0.043) |
|                 | 6 wt%        | 4.5          | 451                 | 26        | 4639                            | 11.0                             | 7.7                              | 20.5/5.7             | (0.147,0.048) |
|                 | 10 wt%       | 4.6          | 451                 | 25        | 4347                            | 10.7                             | 7.3                              | 19.5/4.4             | (0.147,0.050) |

**Table S8.** Summary of the sensitizer-free devices performance of **NBO-mSAF** and **NBO-pSAF** in PPF host.

| Emitter         | Doping Ratio | $V_{on}$ [V] | $\lambda_{EL}$ [nm] | FWHM [nm] | $L_{max}$ [cd m <sup>-2</sup> ] | $CE_{max}$ [cd A <sup>-1</sup> ] | $PE_{max}$ [lm W <sup>-1</sup> ] | $EQE_{max/1000}$ [%] | CIE [x,y]     |
|-----------------|--------------|--------------|---------------------|-----------|---------------------------------|----------------------------------|----------------------------------|----------------------|---------------|
| <b>NBO-mSAF</b> | 3 wt%        | 4.2          | 468                 | 34        | 1157                            | 12.5                             | 9.4                              | 11.5/1.1             | (0.126,0.147) |
|                 | 6 wt%        | 3.4          | 472                 | 34        | 2857                            | 21.9                             | 20.2                             | 17.7/1.7             | (0.120,0.180) |
|                 | 10 wt%       | 3.6          | 472                 | 34        | 2276                            | 16.1                             | 14.0                             | 13.2/1.5             | (0.125,0.174) |
| <b>NBO-pSAF</b> | 3 wt%        | 4.6          | 454                 | 32        | 593                             | 9.8                              | 6.7                              | 14.2/2.1             | (0.144,0.069) |
|                 | 6 wt%        | 3.8          | 456                 | 32        | 1029                            | 13.0                             | 10.7                             | 16.1/1.2             | (0.142,0.087) |
|                 | 10 wt%       | 4.0          | 456                 | 32        | 1188                            | 12.6                             | 9.9                              | 13.4/1.1             | (0.145,0.105) |

## 6. References

- 1 I. S. Park, M. Yang, H. Shibata, N. Amanokura and T. Yasuda, *Adv. Mater.*, 2022, **34**, 2107951.
- 2 I. S. Park, H. Min and T. Yasuda, *Angew. Chem. Int. Ed.*, 2022, **61**, e202205684.
- 3 J. Park, J. Lim, J. H. Lee, B. Jang, J. H. Han, S. S. Yoon and J. Y. Lee, *ACS Appl. Mater. Interfaces*, 2021, **13**, 45798–45805.
- 4 C.-Y. Chan, S. Madayanad Suresh, Y.-T. Lee, Y. Tsuchiya, T. Matulaitis, D. Hall, A. M. Z. Slawin, S. Warriner, D. Beljonne, Y. Olivier, C. Adachi and E. Zysman-Colman, *Chem. Commun.*, 2022, **58**, 9377–9380.
- 5 J. Jin, M. Chen, H. Jiang, B. Zhang, Z. Xie and W.-Y. Wong, *ACS Mater. Lett.*, 2024, 3246–3253.
- 6 X. Huang, Y. Xu, J. Miao, Y.-Y. Jing, S. Wang, Z. Ye, Z. Huang, X. Cao and C. Yang, *J. Mater. Chem. C*, 2023, **11**, 11885–11894.
- 7 Y. Xu, J. Han, N. Li, Z. Huang, J. Miao and C. Yang, *J. Mater. Chem. C*, 2023, **11**, 13733–13739.
- 8 H. Tanaka, S. Oda, G. Ricci, H. Gotoh, K. Tabata, R. Kawasumi, D. Beljonne, Y. Olivier and T. Hatakeyama, *Angew. Chem. Int. Ed.*, 2021, **60**, 17910–17914.
- 9 X. Luo, H. Ni, A. Lv, X. Yao, H. Ma and Y. Zheng, *Adv. Opt. Mater.*, 2022, **10**, 2200504.
- 10 J. Liu, L. Chen, X. Wang, Q. Yang, L. Zhao, C. Tong, S. Wang, S. Shao and L. Wang, *Macromol. Rapid Commun.*, 2022, **43**, 2200079.
- 11 G. Liu, H. Sasabe, K. Kumada, H. Arai and J. Kido, *Chem. – Eur. J.*, 2022, **28**, e202201605.
- 12 J. Han, Z. Huang, X. Lv, J. Miao, Y. Qiu, X. Cao and C. Yang, *Adv. Opt. Mater.*, 2022, **10**, 2102092.
- 13 Z. Yan, L. Yuan, Y. Zhang, M. Mao, X. Liao, H. Ni, Z. Wang, Z. An, Y. Zheng and J. Zuo, *Adv. Mater.*, 2022, **34**, 2204253.
- 14 J. Jin, C. Duan, H. Jiang, P. Tao, H. Xu and W. Wong, *Angew. Chem. Int. Ed.*, 2023, **62**, e202218947.
- 15 K. R. Naveen, J. H. Oh, H. S. Lee and J. H. Kwon, *Angew. Chem. Int. Ed.*, 2023, **62**,

e202306768.

- 16 X. He, J. Lou, B. Li, X. Dong, F. Zhong, W. Liu, X. Feng, D. Yang, D. Ma, Z. Zhao, Z. Wang and B. Z. Tang, *Adv. Mater.*, 2024, **36**, 2310417.
- 17 J. Hu, Y. Wei, X. Wang, X. Liang, X. Liao, L. Yuan, H. Ni and Y. Zheng, *Adv. Opt. Mater.*, 2024, 2302987.
- 18 Y. Yin, X. Lai, Q. Ma, H. Ma, W. Zhu, J. Y. Lee and Y. Wang, *Adv. Mater.*, 2024, **36**, 2313656.
- 19 T. Lu and F. Chen, *J. Comput. Chem.*, 2012, **33**, 580–592.
